# Supplementary material
Source: publisher figshare collection journal article supplement (https://asha.figshare.com/articles/dataset/_/6170288)
Supplement: Supplementary file 2 [file 1]

**Supplemental Appendix A.** Forms for teacher and parent feedback.

**Team Teaching Feedback Sheet**

Developed by

*Laura Pinger*, Center for Investigating Health Minds, University of Wisconsin–Madison

*Chris Smith*, University of Wisconsin Health Integrative Medicine Clinic

Used with permission.

**NAME:** \_\_\_\_\_

**DATE:** \_\_\_\_\_

|                                                                            | <b>Strongly<br/>Disagree</b> | <b>Disagree</b> | <b>Somewhat<br/>Disagree</b> | <b>Neutral</b> | <b>Somewhat<br/>Agree</b> | <b>Agree</b> | <b>Strongly<br/>Agree</b> |
|----------------------------------------------------------------------------|------------------------------|-----------------|------------------------------|----------------|---------------------------|--------------|---------------------------|
| 1. Lesson was well organized                                               |                              |                 |                              |                |                           |              |                           |
| 2. Demonstrated flexibility and responsiveness based on children           |                              |                 |                              |                |                           |              |                           |
| 3. Demonstrated strategies to ready the children to listen and participate |                              |                 |                              |                |                           |              |                           |
| 4. Used clear, concise directions                                          |                              |                 |                              |                |                           |              |                           |
| 5. Engaged children in active participation during teaching                |                              |                 |                              |                |                           |              |                           |
| 6. Managed the group process (balance between individual and group needs)  |                              |                 |                              |                |                           |              |                           |

**NOTES:**

**One thing I felt went well in class was:**

---

---

**One thing I felt did not go well in class was:**

---

---

**If I could have a redo for class, I would:**

---

---

**One question I have about the class or lesson is:**

---

---

## **TALK: Talk and Learn for Kindergarten**

### **Parent Survey**

Please take some time to fill out this survey to help us know what went well with the TALK program. We have appreciated your support in the program so far and enjoyed being in the classroom this summer.

#### **Does your child ...**

|                                                                                                                                                                                      |            |           |
|--------------------------------------------------------------------------------------------------------------------------------------------------------------------------------------|------------|-----------|
| 1.Say hello in different languages (hola, guten tag, aloha, etc.)?                                                                                                                   | <b>yes</b> | <b>no</b> |
| 2.Talk to you about any of the stories or songs from the program (i.e., animals, musical instruments, the three billy goats gruff, vehicles, fairy tales, rhyming or letter sounds)? | <b>yes</b> | <b>no</b> |
| 3.Talk about Teacher Brittany, Alissa, or Peggy?                                                                                                                                     | <b>yes</b> | <b>no</b> |
| 4.Rhyme words or point out rhyme?                                                                                                                                                    | <b>yes</b> | <b>no</b> |
| 5.Say the letters of the alphabet?                                                                                                                                                   | <b>yes</b> | <b>no</b> |
| 6.Use hand signs for letters of the alphabet?                                                                                                                                        | <b>yes</b> | <b>no</b> |
| 7. Say the sounds that letters make?                                                                                                                                                 | <b>yes</b> | <b>no</b> |
| 8. Clap out the parts in words?                                                                                                                                                      | <b>yes</b> | <b>no</b> |
| 9. Break apart words into sounds?                                                                                                                                                    | <b>yes</b> | <b>no</b> |

**What is one thing you liked about the program?**

**What is one thing you would have liked to change about the program?**

**Do you have any additional comments or questions?**
